# Supplementary material for: L/Z-ligand type amphoterism of an acridinium unit
Source: Royal Society of Chemistry journal article supplement (doi:10.1039/d5sc00965k), 2025-01-01
Supplement: d5sc00965k1.pdf [file d5sc00965k1.pdf]

## **L/Z-ligand type amphoterism of an acridinium unit**

Elishua D. Litle, Shantabh Bedajna and François P. Gabbaï\*

### **Supporting Information**

#### **Contents**

|                                                                                                          |    |
|----------------------------------------------------------------------------------------------------------|----|
| 1 Experimental                                                                                           | 2  |
| 1.1 General experimental                                                                                 | 2  |
| 1.2 Synthesis                                                                                            | 2  |
| 2 NMR spectra                                                                                            | 4  |
| 2.1 NMR spectra of products                                                                              | 4  |
| 2.2 NMR spectra of reactions                                                                             | 9  |
| 3 Computational studies                                                                                  | 17 |
| 3.1 General methods                                                                                      | 17 |
| 3.2 Geometry optimized structures                                                                        | 17 |
| 3.4 Pipek-Mezey LMOs                                                                                     | 19 |
| 3.5 NBO orbital analysis                                                                                 | 20 |
| 3.6 Cartesian coordinates of geometry optimized structures                                               | 22 |
| 4 X-ray diffraction analysis                                                                             | 24 |
| 4.1 Experimental details                                                                                 | 24 |
| 4.2 Table showing the compounds characterized by X-ray diffraction and their corresponding CCDC numbers. | 24 |
| 4.2 Solid state structures                                                                               | 25 |
| 5 References                                                                                             | 26 |

## 1 Experimental

### 1.1 General experimental

All reactions and manipulations were carried out under an atmosphere of dry, O<sub>2</sub>-free nitrogen using standard double-manifold techniques with a rotary oil pump unless otherwise stated. A nitrogen-filled glove box was used to manipulate solids, store air-sensitive starting materials, carry out room temperature reactions, recover reaction products and prepare samples for analysis. All solvents were dried by refluxing under N<sub>2</sub> over Na/K (Et<sub>2</sub>O), Na (Hexanes) or CaH<sub>2</sub> (CH<sub>3</sub>CN, CH<sub>2</sub>Cl<sub>2</sub>, C<sub>2</sub>H<sub>4</sub>Cl<sub>2</sub>) and stored under a nitrogen atmosphere over 3 Å molecular sieves. The deuterated solvents (CD<sub>2</sub>Cl<sub>2</sub>, CDCl<sub>3</sub>, CD<sub>3</sub>CN) used in this work were distilled over CaH<sub>2</sub> and were stored under a nitrogen atmosphere over 3 Å molecular sieves. DMSO-*d*<sub>6</sub> was purchased from commercial suppliers and used as received. [Rh(COD)Cl]<sub>2</sub> and [Rh(COE)<sub>2</sub>Cl]<sub>2</sub> were purchased from TCI America and used as received. <sup>1</sup>H, <sup>13</sup>C and <sup>31</sup>P{<sup>1</sup>H} NMR spectra were recorded on a Bruker Avance NEO 400, a Varian VnmrS 500, or a Bruker Avance 500 cold probe spectrometer. The <sup>31</sup>P HPDec-MAS NMR experiment was carried out on a Bruker Avance-400 solid-state NMR spectrometer (400 MHz for <sup>1</sup>H nuclei) equipped with a standard 4-mm MAS probe head. <sup>1</sup>H and <sup>13</sup>C chemical shifts are expressed as parts per million (ppm, δ) downfield of tetramethylsilane (TMS) and are referenced to CDCl<sub>3</sub> (7.26/77.16 ppm), CD<sub>3</sub>CN (1.94/1.32 ppm) or CD<sub>2</sub>Cl<sub>2</sub> (5.32/53.84 ppm) as internal standards. Phosphorus (<sup>31</sup>P) spectra were referenced to H<sub>3</sub>PO<sub>4</sub>. The NMR spectrum of [2][OTf] was collected at 233 K by precaution, to slow down a possible exchange of the MeCN ligands. Abbreviations used for signal description include: s for singlet, d for doublet, t for triplet, m for multiplet and br for broad. All coupling constants are absolute values and are expressed in Hertz (Hz). Elemental analyses were performed by Atlantic Microlab (Norcross, GA). The starting material [L<sup>acr</sup>][OTf] was synthesized as previously described.<sup>1</sup>

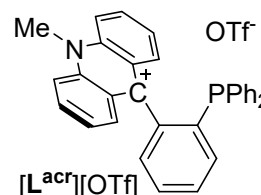

### 1.2 Synthesis

#### Synthesis of [1][OTf]

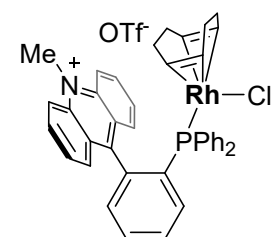

[L<sup>acr</sup>][OTf] (53.6 mg, 0.090 mmol) was dissolved in CH<sub>2</sub>Cl<sub>2</sub> (1 mL) in a 20 mL scintillation vial under nitrogen. [Rh(COD)Cl]<sub>2</sub> (22.2 mg, 0.045 mmol) was added to the solution. The resulting solution was stirred for 10 minutes and treated with Et<sub>2</sub>O (10 mL) which induced the precipitation of a red/brown solid. This precipitate was isolated by filtration and washed with Hexanes (3 x 10 mL) to afford [1][OTf]. Yield: 55.7 mg, 74.2%. Orange needle-like single crystals were obtained by layering Et<sub>2</sub>O on a C<sub>2</sub>H<sub>4</sub>Cl<sub>2</sub> solution of [1][OTf]. <sup>1</sup>H NMR (500 MHz, CDCl<sub>3</sub>, 298 K) δ/ppm: 9.14 (dd, *J* = 14.8, 7.9 Hz, 1H), 8.48 (d, *J* = 9.2 Hz, 2H), 8.19 (ddd, *J* = 8.8, 6.7, 1.5 Hz, 2H), 7.97 (tt, *J* = 7.8, 1.4 Hz, 1H), 7.90 (dd, *J* = 8.6, 1.4 Hz, 2H), 7.72 (tt, *J* = 7.6, 1.5 Hz, 1H), 7.56 – 7.45 (m, 3H), 7.19 (tt, *J* = 7.5, 3.5 Hz, 2H), 7.10 – 7.04 (m, 1H), 7.03 – 6.89 (m, 4H), 6.80 (dt, *J* = 8.0, 4.0 Hz, 4H), 5.51 – 5.47 (m, 2H), 4.81 (s, 3H), 3.05 (dt, *J* = 5.9, 2.9 Hz, 2H), 2.41 – 2.22 (m, 4H), 2.06 – 2.00 (m, 2H), 1.87 (dt, *J* = 14.3, 6.8 Hz, 2H). <sup>13</sup>C NMR (126 MHz, CDCl<sub>3</sub>, 298 K) δ/ppm: 160.16, 141.42, 141.21, 140.62, 139.19, 136.04, 134.15 (d, *J* = 11.2 Hz), 132.77, 132.49, 131.23, 130.53, 130.41, 129.28, 129.16, 127.78, 127.69, 127.64, 127.56, 127.48, 126.49, 122.36, 119.81, 118.36, 105.19 – 104.91 (m), 71.36 (d, *J* = 13.3 Hz), 39.21, 33.09 (d, *J* = 2.7 Hz), 29.04. <sup>31</sup>P{<sup>1</sup>H} NMR (162 MHz, CD<sub>2</sub>Cl<sub>2</sub>, 298 K) δ/ppm: 33.95 (d, <sup>1</sup>*J*<sub>P-Rh</sub> = 150.7 Hz). **Elemental Analysis** for C<sub>41</sub>H<sub>37</sub>ClF<sub>3</sub>NO<sub>3</sub>PRhS(C<sub>2</sub>H<sub>4</sub>Cl<sub>2</sub>)<sub>0.25</sub>: C: 56.97; H: 4.38 (Calc.). C: 56.67; H: 4.24 (Found).

### Synthesis of [2][OTf]

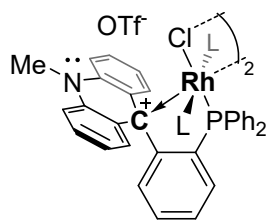

L = MeCN

[L<sup>acr</sup>][OTf] (30 mg, 0.050 mmol) was dissolved in CH<sub>3</sub>CN (2 mL) in a 20 mL scintillation vial under nitrogen. [Rh(COE)<sub>2</sub>Cl]<sub>2</sub> (18 mg, 0.025 mmol) was added to the solution. The resulting solution was stirred for 7 days until the solution turned to a dark red color. The solution was mixed with Et<sub>2</sub>O (2 mL) and allowed to stir for 1 hour. This solution was then treated with an additional 5 mL of Et<sub>2</sub>O which induced the precipitation of a dark red solid. This precipitate was isolated by decantation and washed with Et<sub>2</sub>O (3 x 1 mL) to afford a crystalline powder of [2][OTf]. Yield: 36.0 mg, 88% yield. Dark red, block-like single crystals were obtained by layering Et<sub>2</sub>O onto a CH<sub>3</sub>CN/Et<sub>2</sub>O solution of [2][OTf]-Et<sub>2</sub>O. <sup>1</sup>H NMR (500 MHz, CD<sub>3</sub>CN, 298 K) δ/ppm: δ 7.92 (ddd, *J* = 11.7, 8.4, 1.4 Hz, 4H), 7.78 – 7.64 (m, 3H), 7.62 – 7.53 (m, 3H), 7.50 (tdd, *J* = 8.2, 2.9, 1.3 Hz, 4H), 7.15 (ddd, *J* = 8.5, 7.0, 1.6 Hz, 2H), 7.02 (dd, *J* = 8.4, 1.2 Hz, 2H), 6.58 (ddd, *J* = 8.1, 7.0, 1.2 Hz, 2H), 6.50 (dd, *J* = 7.9, 1.6 Hz, 2H), 3.47 (s, 3H), 2.37 (s, 6H). <sup>13</sup>C NMR (126 MHz, CD<sub>3</sub>CN, 298 K) δ/ppm: 161.16 (d, *J* = 25.2 Hz), 141.48, 134.01, 133.71 (d, *J* = 9.1 Hz), 133.30, 133.17, 132.22, 131.87 (d, *J* = 3.1 Hz), 128.58, 128.49, 128.16 (d, *J* = 7.6 Hz), 127.06, 126.63, 126.15, 121.87 (d, *J* = 8.2 Hz), 119.61, 112.53, 63.02 (d, *J* = 18.3 Hz), 33.88. <sup>31</sup>P{<sup>1</sup>H} NMR (162 MHz, CD<sub>3</sub>CN, 298 K) δ/ppm: 52.95 (d, <sup>1</sup>*J*<sub>P-Rh</sub> = 128.4 Hz). **Elemental Analysis** for C<sub>36</sub>H<sub>31</sub>ClN<sub>3</sub>PRhSO<sub>3</sub>CF<sub>3</sub>: C: 53.93; H: 3.79 (Calc.). C: 53.95; H: 3.86 (Found). This analysis was carried out using crystals of [2][OTf]-Et<sub>2</sub>O. The results indicate loss of the Et<sub>2</sub>O interstitial solvent molecules during shipping and handling.

### Synthesis of [3][OTf]

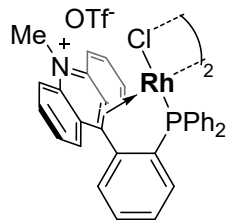

[L<sup>acr</sup>][OTf] (120 mg, 0.20 mmol) was dissolved in CH<sub>2</sub>Cl<sub>2</sub> (2 mL) in a 20 mL scintillation vial under nitrogen. [Rh(COE)<sub>2</sub>Cl]<sub>2</sub> (71.8 mg, 0.1 mmol) was added to the solution. The resulting solution was stirred for 30 minutes until the solution turned to a dark green color. The solution was treated with Hexanes (10 mL), leading to the formation of a dark green powder. This precipitate was isolated by filtration and washed with hexanes (3 x 10 mL) to afford [3][OTf]. Yield: 128.8 mg, 86.8%. Dark green, block-like single crystals were obtained by slow evaporation of a dichloromethane and diethyl ether solution of [3][OTf]. <sup>1</sup>H NMR (500 MHz, CD<sub>2</sub>Cl<sub>2</sub>, 298 K) δ/ppm: 8.12 (s, 2H), 7.89 (br s, 2H), 7.69 (m, 2H), 7.63 (s, 3H), 7.49 (m 8H), 7.19 (t, *J* = 7.6 Hz, 2H), 7.09 (d, *J* = 7.9 Hz, 1H), 6.68 (d, *J* = 8.1 Hz, 2H), 3.86 (br s, 3H). <sup>31</sup>P{<sup>1</sup>H} NMR (162 MHz, CD<sub>2</sub>Cl<sub>2</sub>, 298 K) δ/ppm: 64.71 (d, *J* = 135.3 Hz). **Elemental Analysis** for C<sub>32</sub>H<sub>25</sub>ClN<sub>3</sub>PRhSO<sub>3</sub>CF<sub>3</sub>: C: 53.42; H: 3.40; N: 1.89 (Calc.). C: 53.85; H: 3.70; N: 2.06 (Found).

## 2 NMR spectra

### 2.1 NMR spectra of products

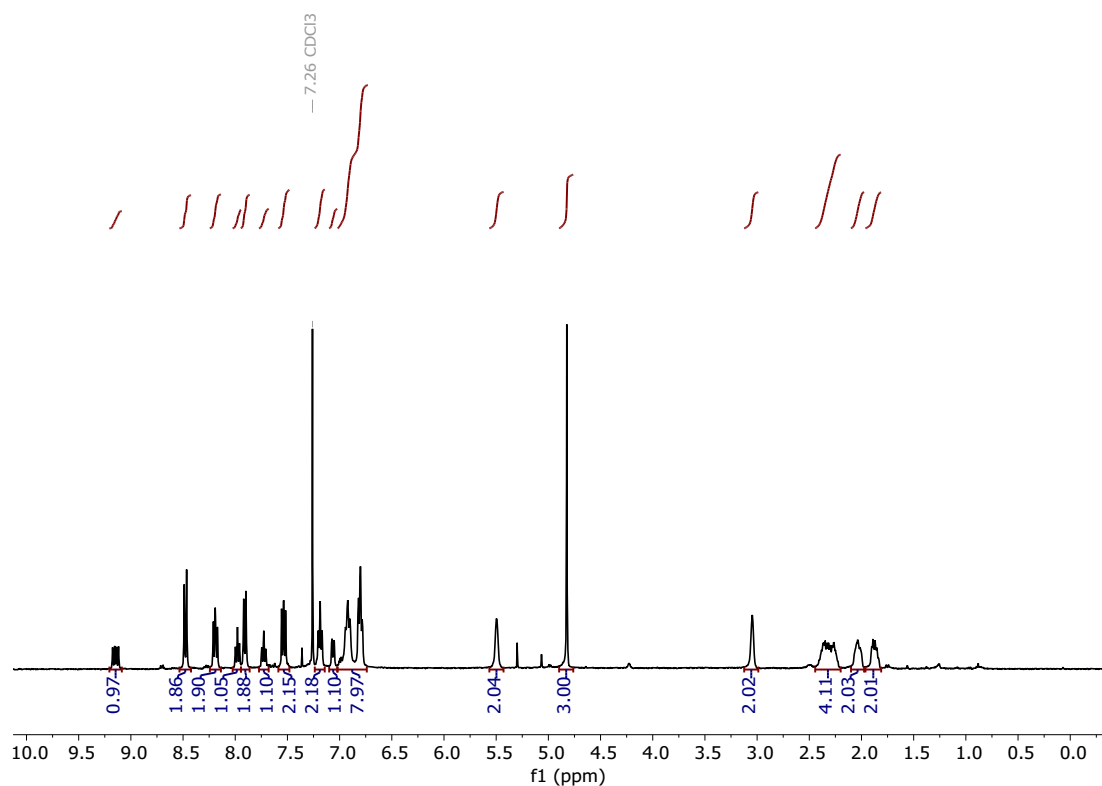

Figure S1.  $^1\text{H}$  NMR (400 MHz,  $\text{CDCl}_3$ , 298 K) spectrum of  $[\mathbf{1}][\text{OTf}]$ .

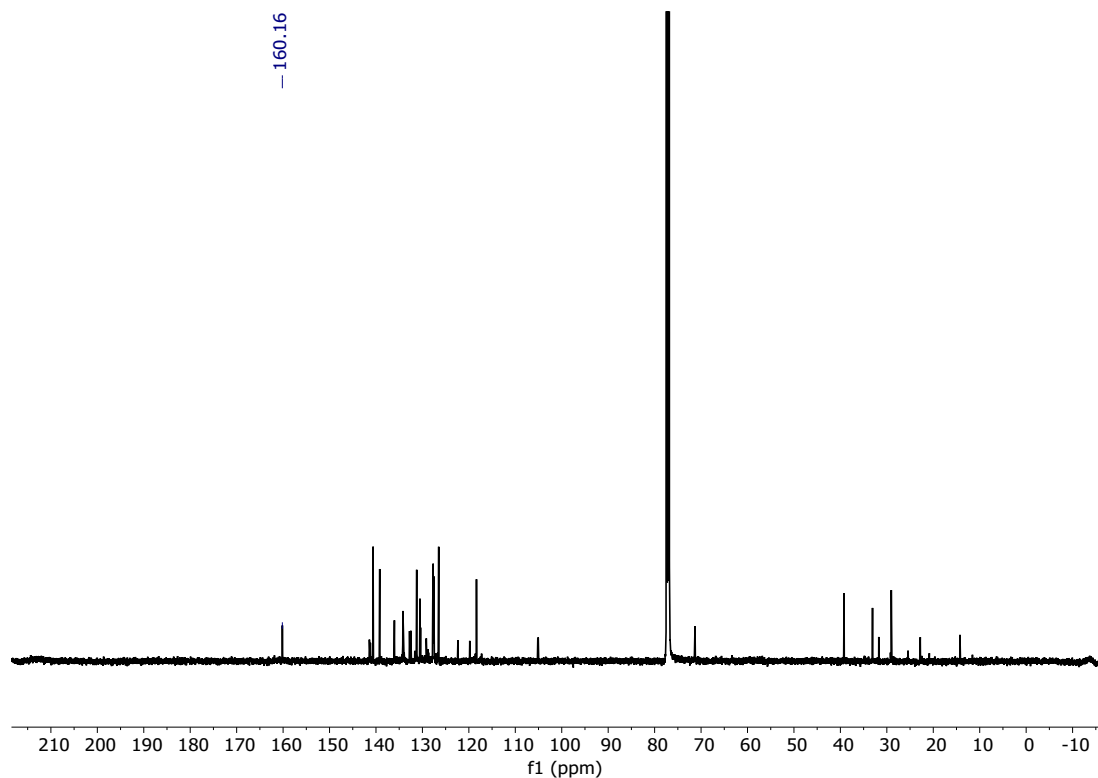

Figure S2.  $^{13}\text{C}\{^1\text{H}\}$  NMR (126 MHz,  $\text{CDCl}_3$ , 298 K) spectrum of  $[\mathbf{1}][\text{OTf}]$ .

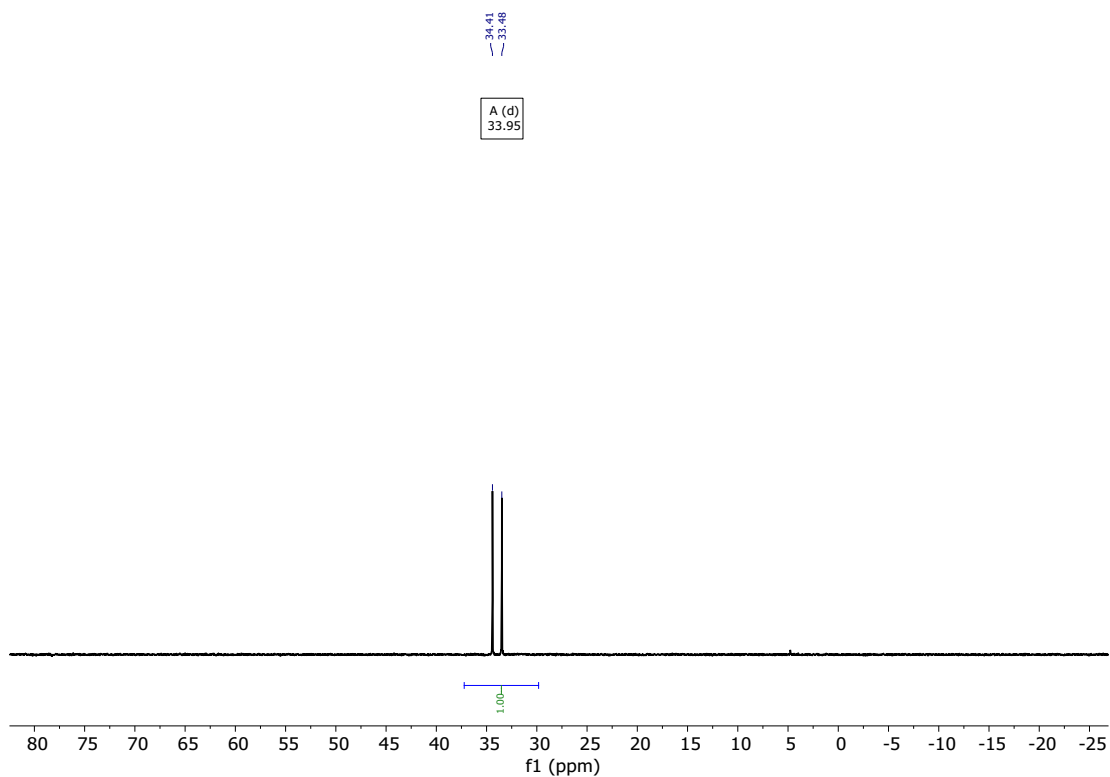

Figure S3.  $^{31}\text{P}\{^1\text{H}\}$  NMR (202 MHz,  $\text{CDCl}_3$ , 298 K) spectrum of **[1]**[OTf].

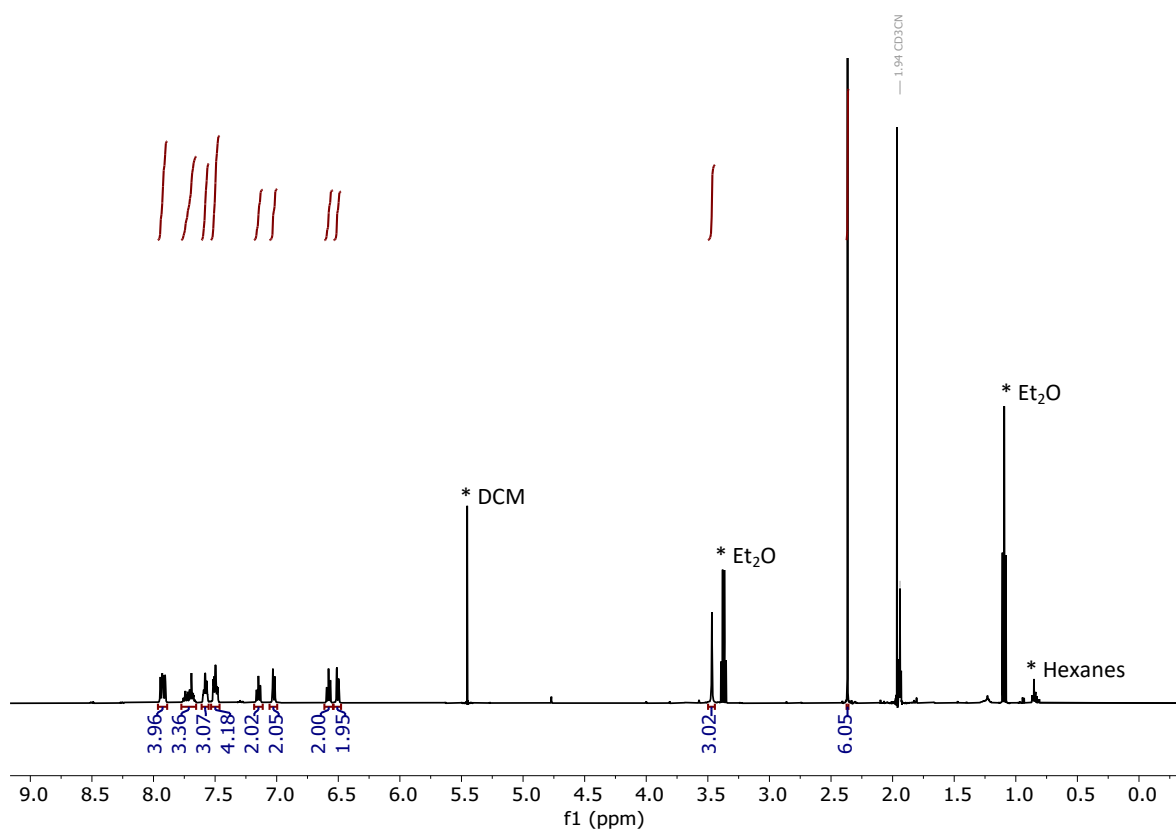

Figure S4.  $^1\text{H}$  NMR (500 MHz,  $\text{CD}_3\text{CN}$ , 233 K) spectrum of **[2]**[OTf].

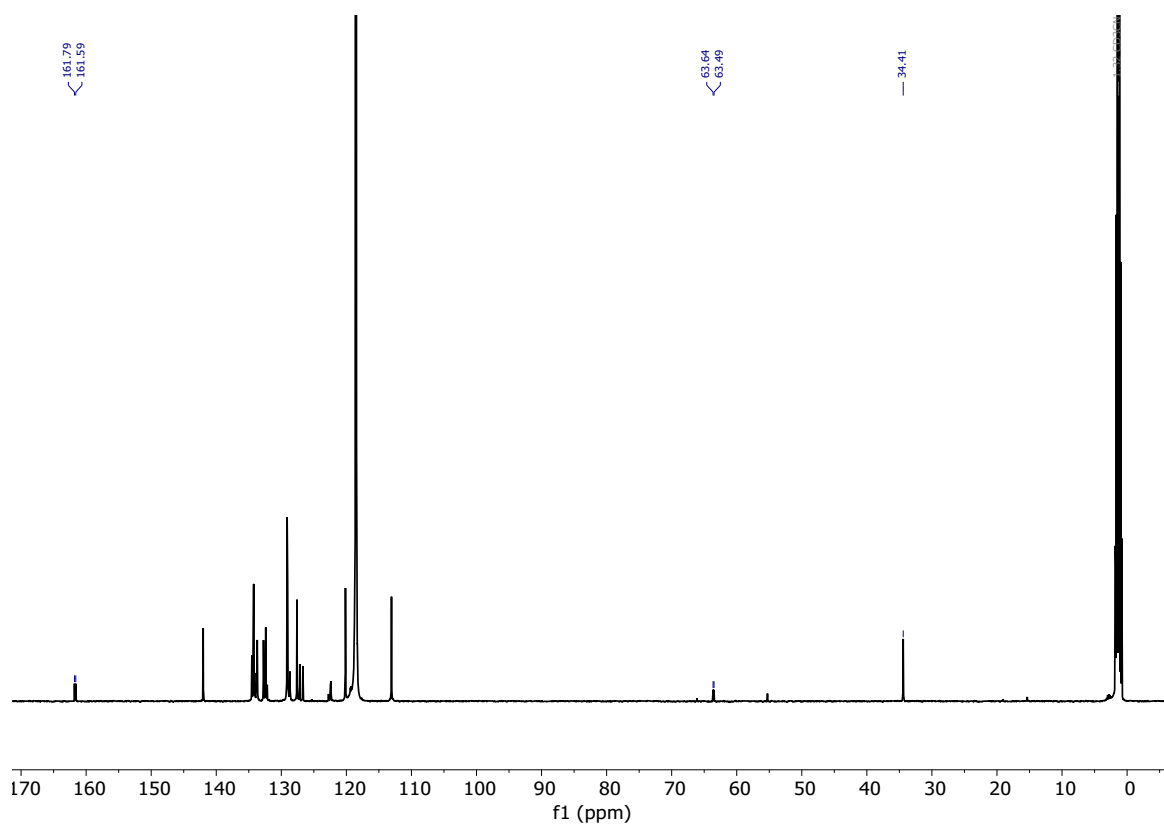

Figure S5.  $^{13}\text{C}\{^1\text{H}\}$  NMR (126 MHz,  $\text{CD}_3\text{CN}$ , 233K) spectrum of **[2][OTf]**.

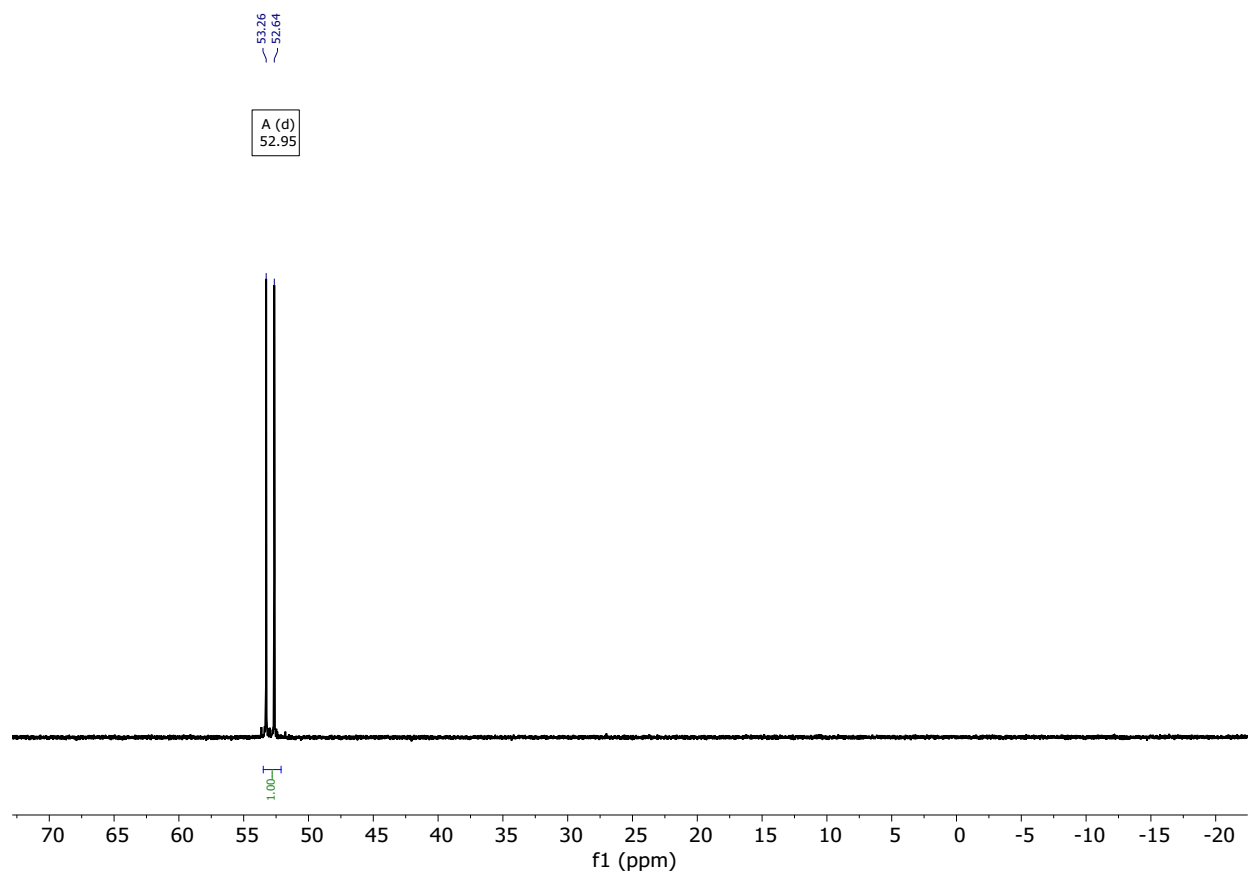

Figure S6.  $^{31}\text{P}\{^1\text{H}\}$  NMR (202 MHz,  $\text{CD}_3\text{CN}$ , 233 K) spectrum of **[2][OTf]**.

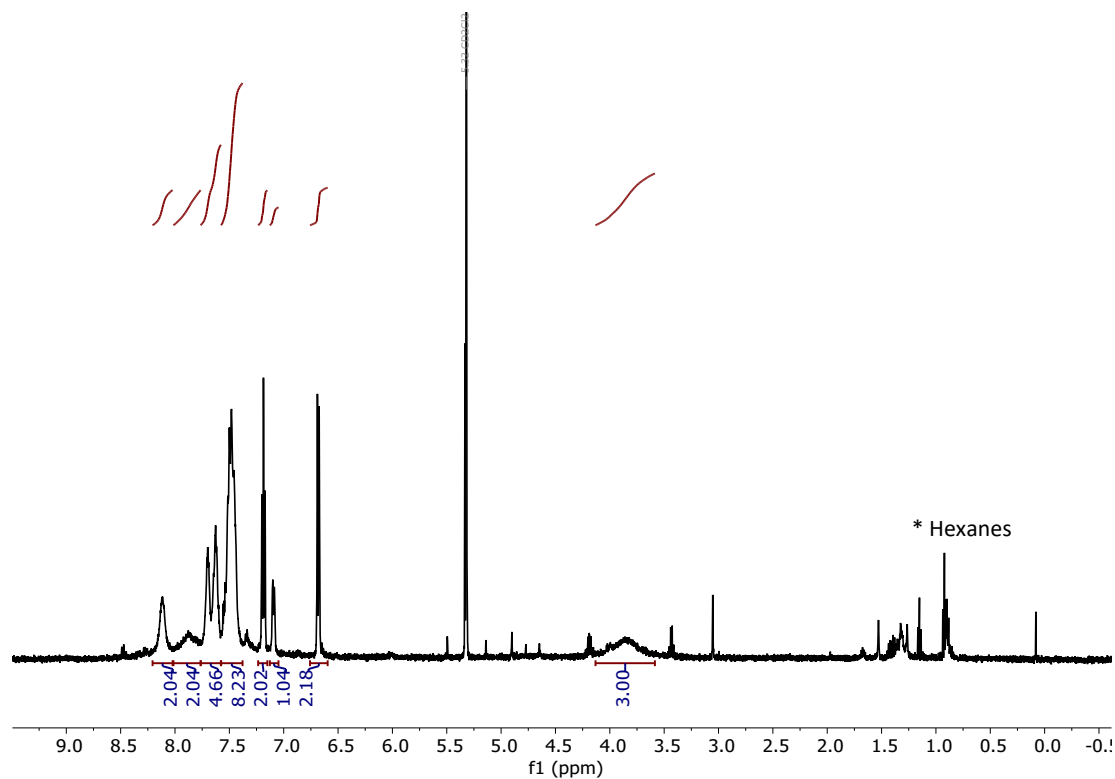

Figure S7.  $^1\text{H}$  NMR (500 MHz,  $\text{CD}_2\text{Cl}_2$ , 298 K) spectrum of  $[\mathbf{3}][\text{OTf}]$ . The poor quality of this spectrum reflects the low solubility of the complex.

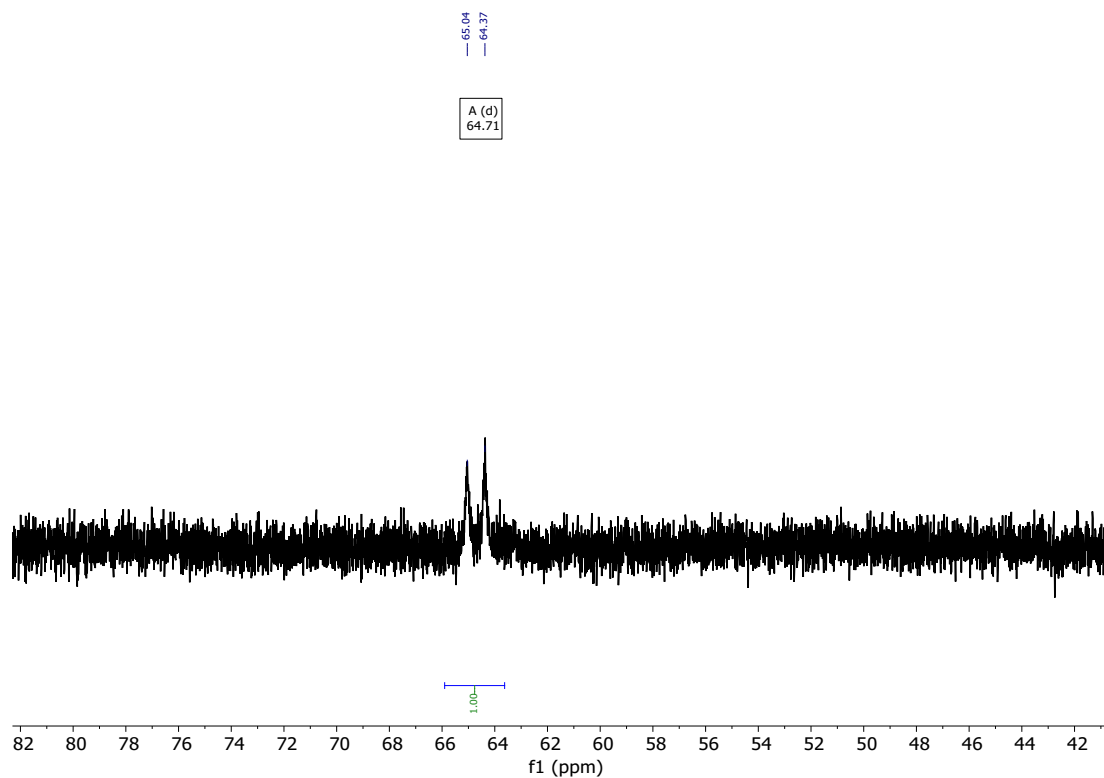

Figure S8.  $^{31}\text{P}\{^1\text{H}\}$  NMR (162 MHz,  $\text{CD}_2\text{Cl}_2$ , 298 K) spectrum of  $[\mathbf{3}][\text{OTf}]$ .

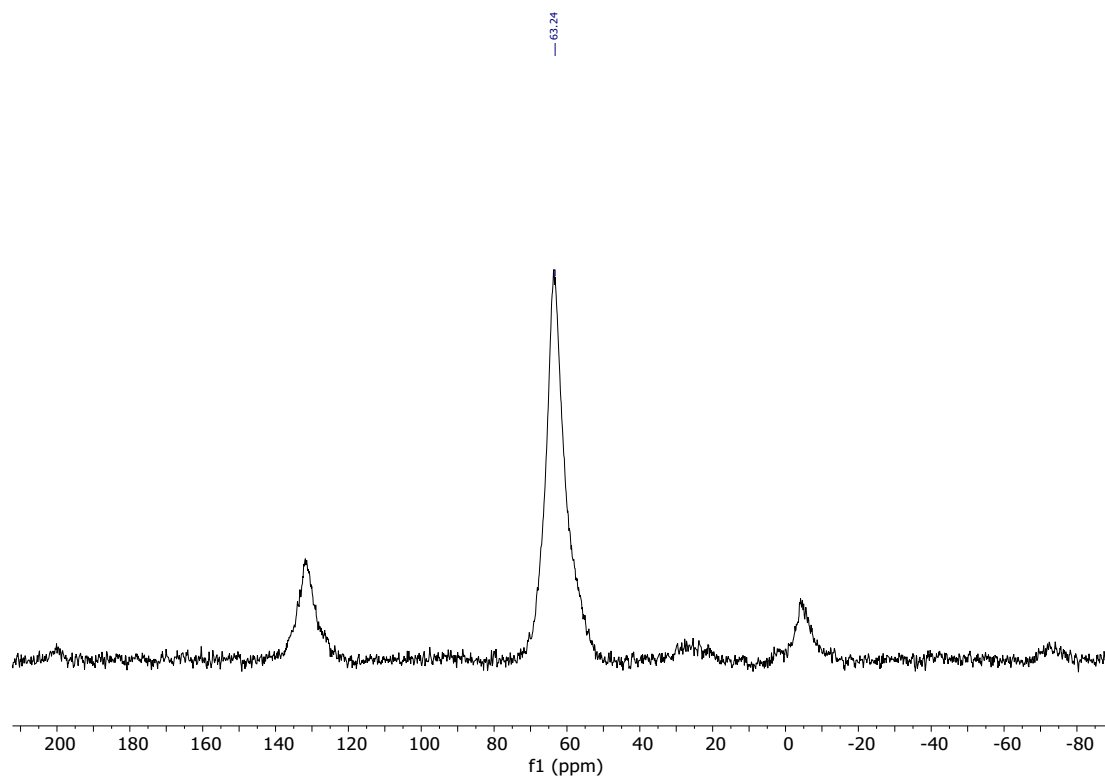

Figure S9. Solid-state  $^{31}\text{P}$  NMR (162 MHz, 298 K) spectrum of **[3][OTf]**.



## 2.2 NMR spectra of reactions

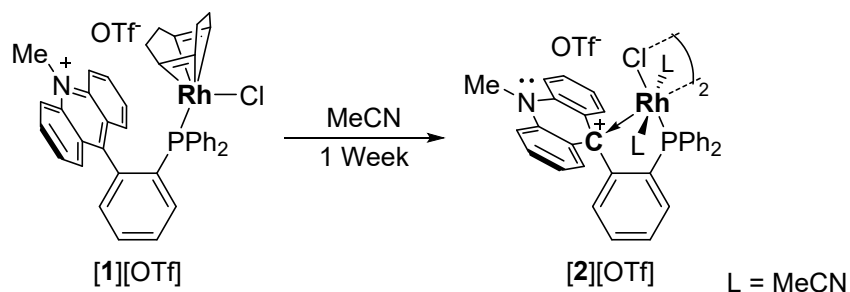

Conversion of  $[1][OTf]$  into  $[2][OTf]$ :  $[1][OTf]$  (10 mg), dissolved in  $CD_3CN$  (0.6 mL) was loaded into a J. Young tube and. An initial  $^{31}P\{^1H\}$  NMR spectrum was collected, showing a broadening of the signal corresponding to  $[1][OTf]$  at 33.88 ppm. Additional spectra were collected every 24 hours over a week. The signal at 33.88 ppm gradually disappeared while that of  $[2][OTf]$  at 53.68 ppm gained intensity. In the course of this experiment, the solution's color changed from yellow to a dark red. Single crystals of  $[2][OTf]$  could be grown from this reaction.

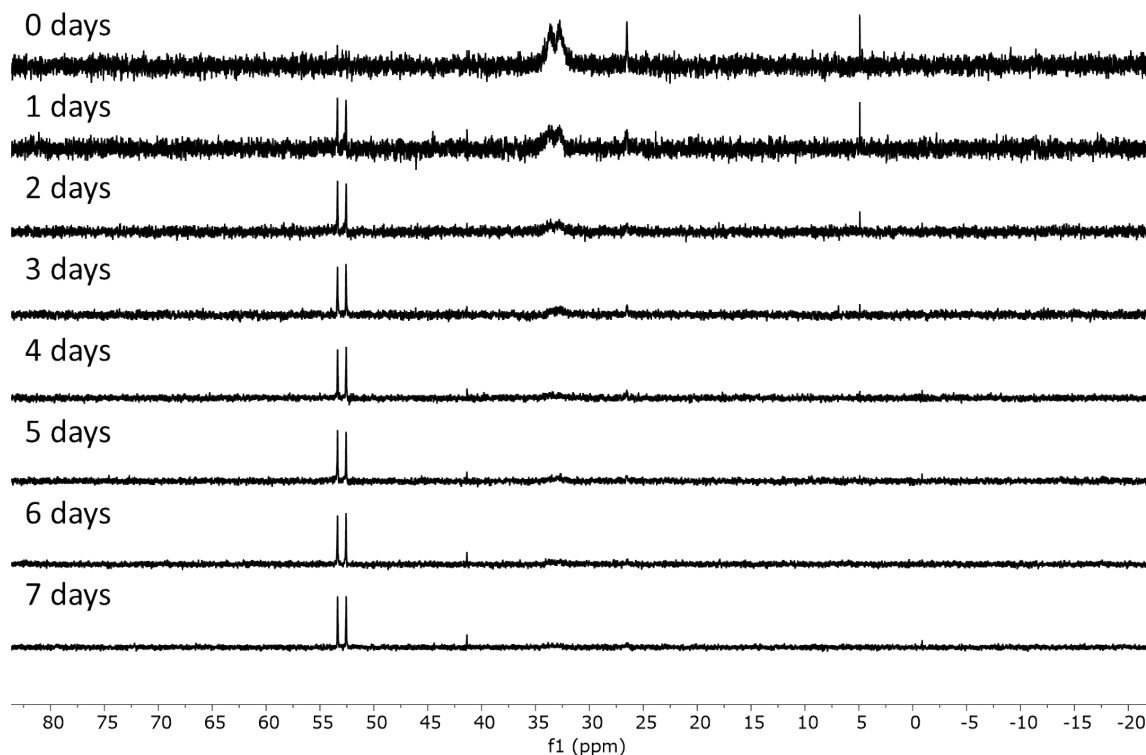

Figure S10.  $^{31}P\{^1H\}$  NMR (162 MHz,  $CD_3CN$ , 298 K) spectra collected during the conversion of complex  $[1][OTf]$  into  $[2][OTf]$  over 1 week.

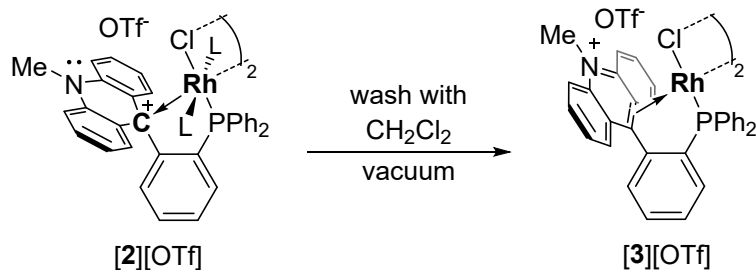

Conversion of  $[2][OTf]$  into  $[3][OTf]$ :  $[3][OTf]$  (4 mg) in MeCN (0.6 mL) was loaded into a J. Young tube containing a sealed  $H_3PO_4/DMSO-d_6$  capillary. The resulting red solution was subjected to  $^{31}P\{^1H\}$  NMR spectroscopy, leading to a signal at 53.68 ppm (d,  $^1J_{P-Rh} = 128.4$  Hz) for  $[2][OTf]$ . The solvent from the J. Young tube was removed under a vacuum. The resulting residue was redissolved in  $CH_2Cl_2$ . This procedure was repeated three times. The residue was then dissolved in  $CH_2Cl_2$  (0.6 mL), affording a dark green solution. The  $^{31}P\{^1H\}$  NMR spectrum of this solution displayed a signal at 64.59 ppm (d,  $^1J_{P-Rh} = 137.7$  Hz) corresponding to  $[3][OTf]$ .

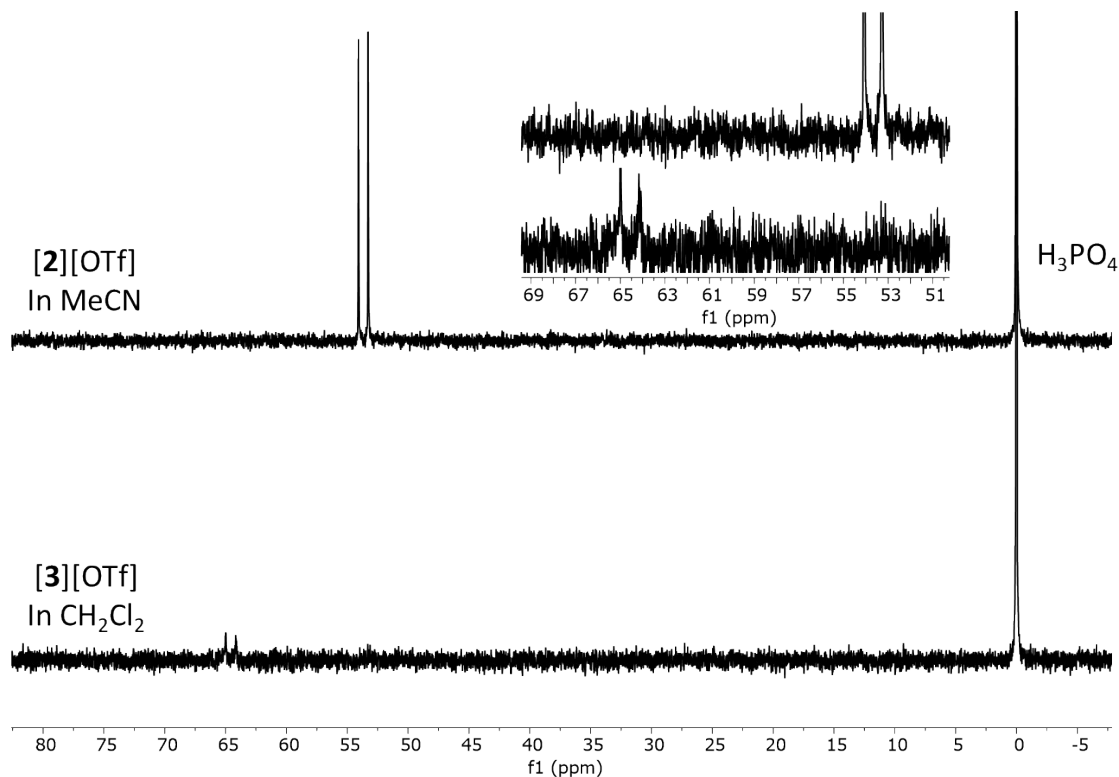

Figure S11.  $^{31}P\{^1H\}$  NMR (162 MHz,  $DMSO-d_6$ , 298 K) spectra collected during the conversion of complex  $[2][OTf]$  into  $[3][OTf]$  (L = MeCN).

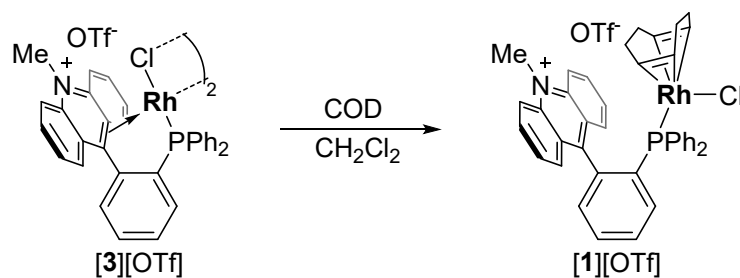

Conversion of **[3][OTf]** into **[1][OTf]** was done as follows: **[3][OTf]** (4 mg) was loaded into a J. Young tube containing a sealed  $\text{H}_3\text{PO}_4/\text{DMSO-}d_6$  capillary and dissolved in  $\text{CH}_2\text{Cl}_2$  (0.6 mL) forming a dark green solution. A  $^{31}\text{P}$  NMR spectrum was collected. A signal at  $\delta$  64.64 (d,  $J = 137.3$  Hz) was identified as **[3][OTf]** (referenced to the  $\text{H}_3\text{PO}_4/\text{DMSO-}d_6$ ). Addition of cyclooctadiene (4 equiv., 1.2  $\mu\text{L}$ ) to the J. Young tube led to a change in color from green to yellow over a 10 minute period at which time a  $^{31}\text{P}\{^1\text{H}\}$  NMR spectrum was collected. A signal at  $\delta$  33.88 (d,  $J = 150.8$  Hz) was identified as **[1][OTf]** (referenced to the  $\text{H}_3\text{PO}_4/\text{DMSO-}d_6$ ).

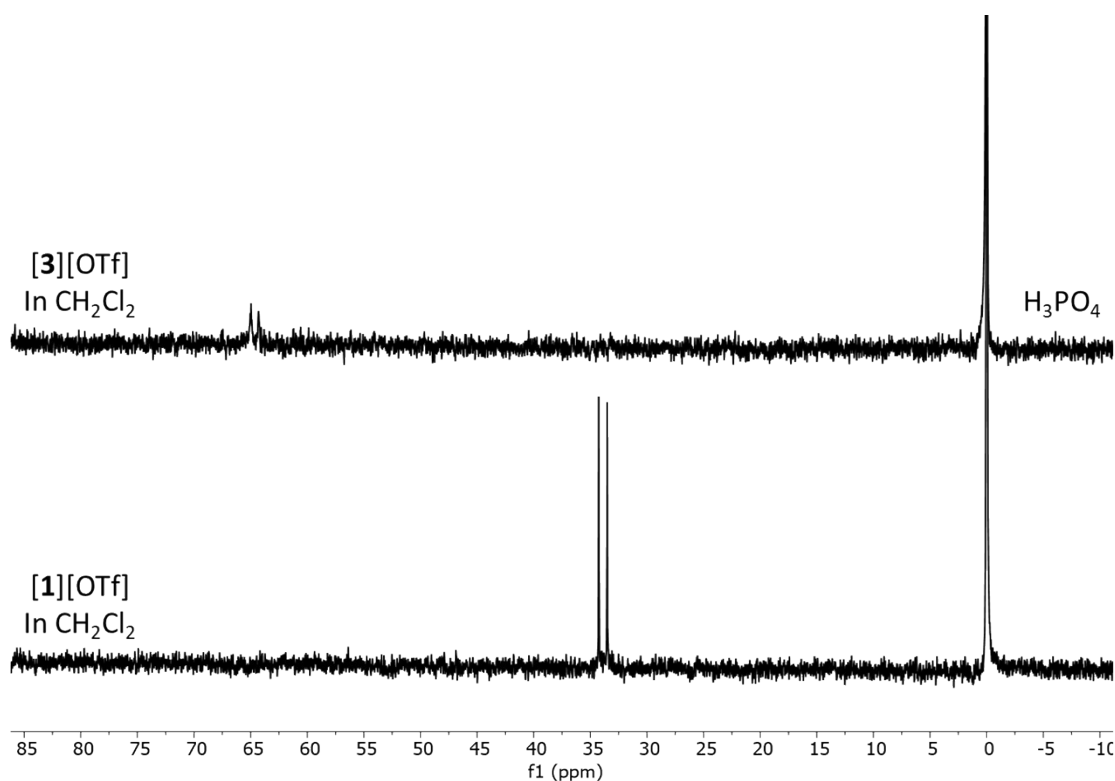

Figure S12.  $^{31}\text{P}\{^1\text{H}\}$  NMR (202 MHz,  $\text{DMSO-}d_6$ , 298 K) spectrum of the conversion of complex **[3][OTf]** (top: 64.69 ppm) into **[1][OTf]** (Bottom: 33.88 ppm). Referenced internally to a capillary of 85%  $\text{H}_3\text{PO}_4$  dissolved in  $\text{DMSO-}d_6$ .

Resistance of **[2]**[OTf] to COD. **[3]**[OTf] (4 mg) was loaded into a J. Young tube, dissolved in  $\text{CD}_2\text{Cl}_2$  (0.6 mL), and converted into **[2]**[OTf] by addition of  $\text{CD}_3\text{CN}$  (0.1 mL), forming a dark green solution. Subsequently, an excess of cyclooctadiene (25  $\mu\text{L}$ ) was added to the J. Young tube, which left **[2]**[OTf] unchanged as shown in Fig. S13.

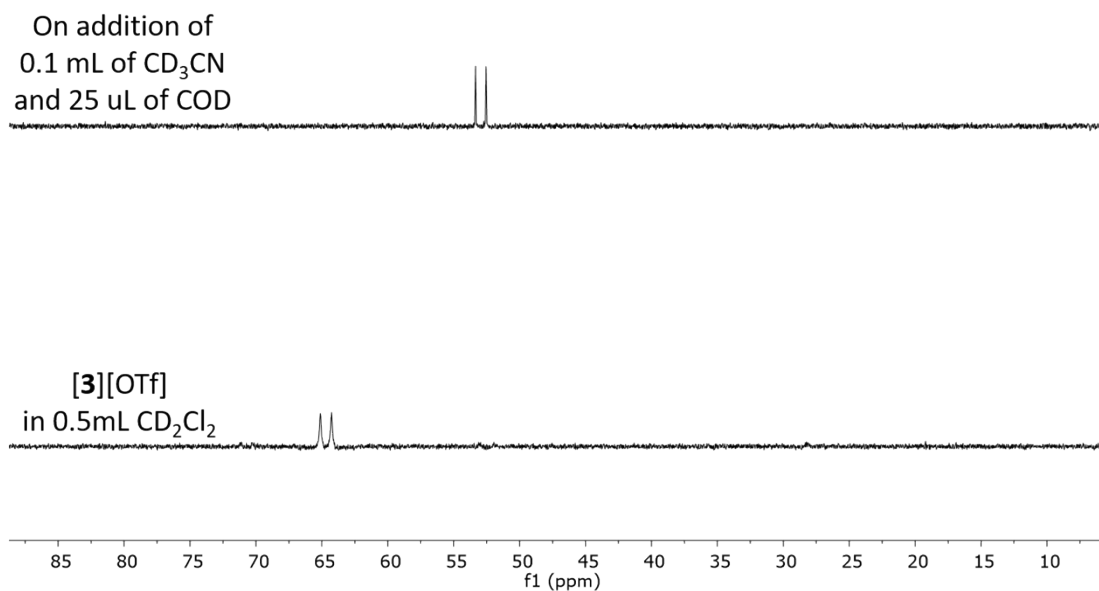

Figure S13.  $^{31}\text{P}\{^1\text{H}\}$  NMR (202 MHz, 298 K) spectrum of the conversion of complex **[3]**[OTf] into **[2]**[OTf].

Stability of **[2][OTf]** in the presence of O<sub>2</sub>. An NMR sample of **[2][OTf]** was generated by dissolving **[3][OTf]** (4 mg) in CH<sub>2</sub>Cl<sub>2</sub> (0.6 ml) and MeCN (0.1 mL) inside a nitrogen-filled glove box. The headspace of the NMR tube was flushed with O<sub>2</sub> for 15 seconds. The sample was then sonicated for 1 minute and subjected to <sup>31</sup>P{<sup>1</sup>H} NMR spectroscopy. The spectrum, displayed in Fig. S14, shows negligible decomposition of **[2][OTf]** even if the phosphine oxide [*o*-Ph<sub>2</sub>P(O)(C<sub>6</sub>H<sub>4</sub>)Acr)]<sup>+</sup> starts appearing at 26 ppm.

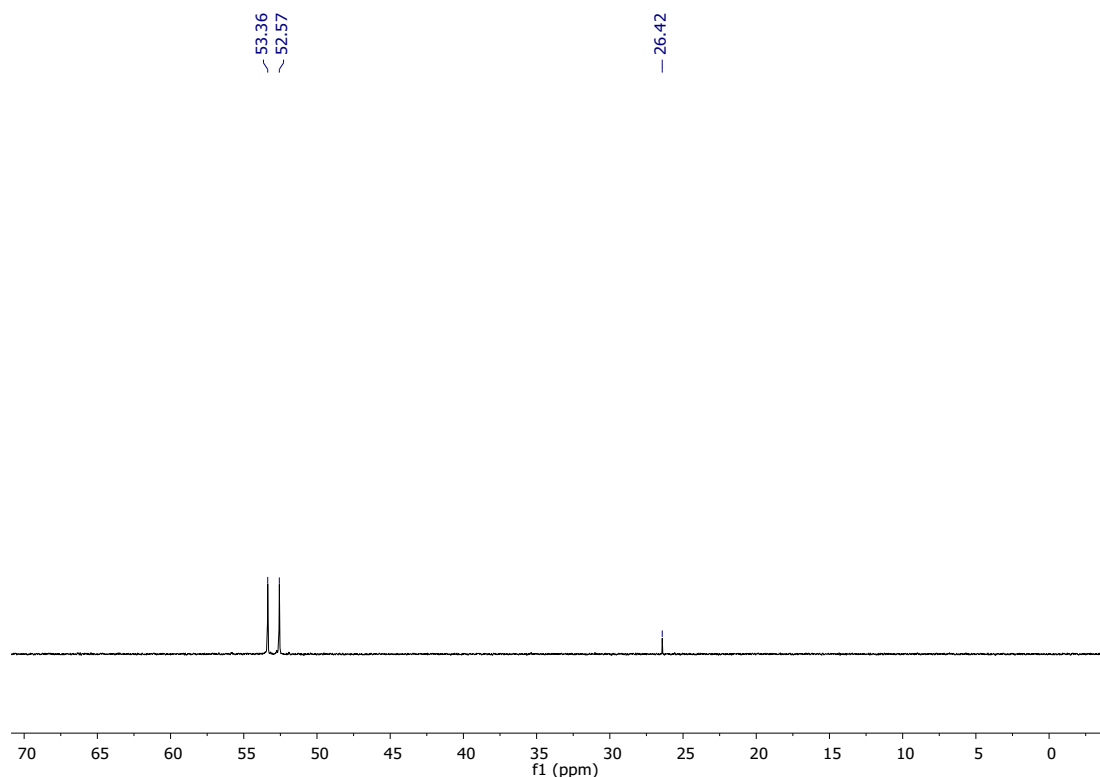

Figure S14. <sup>31</sup>P{<sup>1</sup>H} NMR (202 MHz, 298 K) spectrum of a solution of **[2][OTf]** after exposure to O<sub>2</sub>.

Stability of [3][OTf] in the presence of O<sub>2</sub>. An NMR sample containing [3][OTf] (4 mg) in CH<sub>2</sub>Cl<sub>2</sub> (0.6 ml) was prepared inside a nitrogen-filled glove box. The headspace of the NMR tube was flushed with O<sub>2</sub> for 15 seconds. The sample was then sonicated for 1 minute and subjected to <sup>31</sup>P{<sup>1</sup>H} NMR spectroscopy. The spectrum, displayed in Fig. S15, shows almost complete decomposition of [3][OTf] and formation of the phosphine oxide [(*o*-Ph<sub>2</sub>P(O)(C<sub>6</sub>H<sub>4</sub>)Acr)]<sup>+</sup> which appears at 27 ppm.

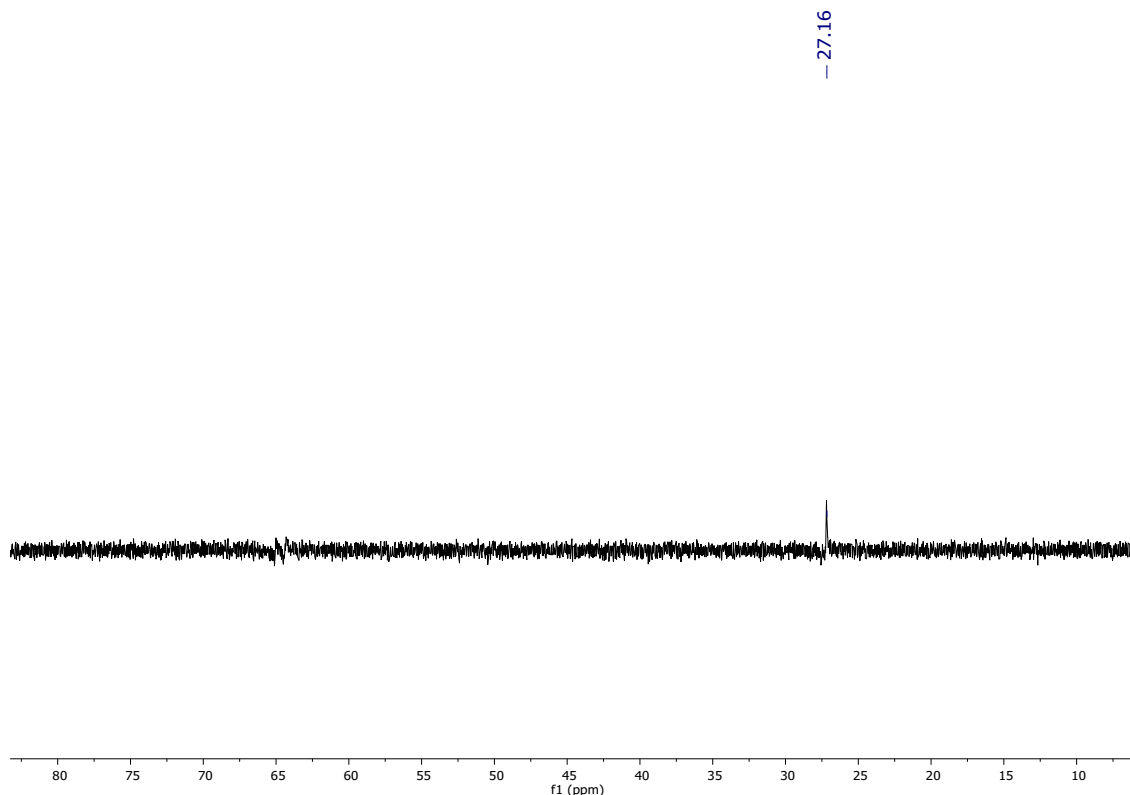

Figure S15. <sup>31</sup>P{<sup>1</sup>H} NMR (202 MHz, 298 K) spectrum of a solution of [3][OTf] after exposure to O<sub>2</sub>.

Stability of [2][OTf] in the presence of H<sub>2</sub>O: An NMR sample of [2][OTf] was generated by dissolving [3][OTf] (4 mg) in CH<sub>2</sub>Cl<sub>2</sub> (0.6 ml) and MeCN (0.1 mL) inside a nitrogen-filled glove box. This sample was combined with D<sub>2</sub>O (15 μL), sonicated for 15 min and subjected to <sup>31</sup>P{<sup>1</sup>H} NMR spectroscopy. The spectrum, displayed in Fig. S16, shows that [2][OTf] remains largely unperturbed by water.

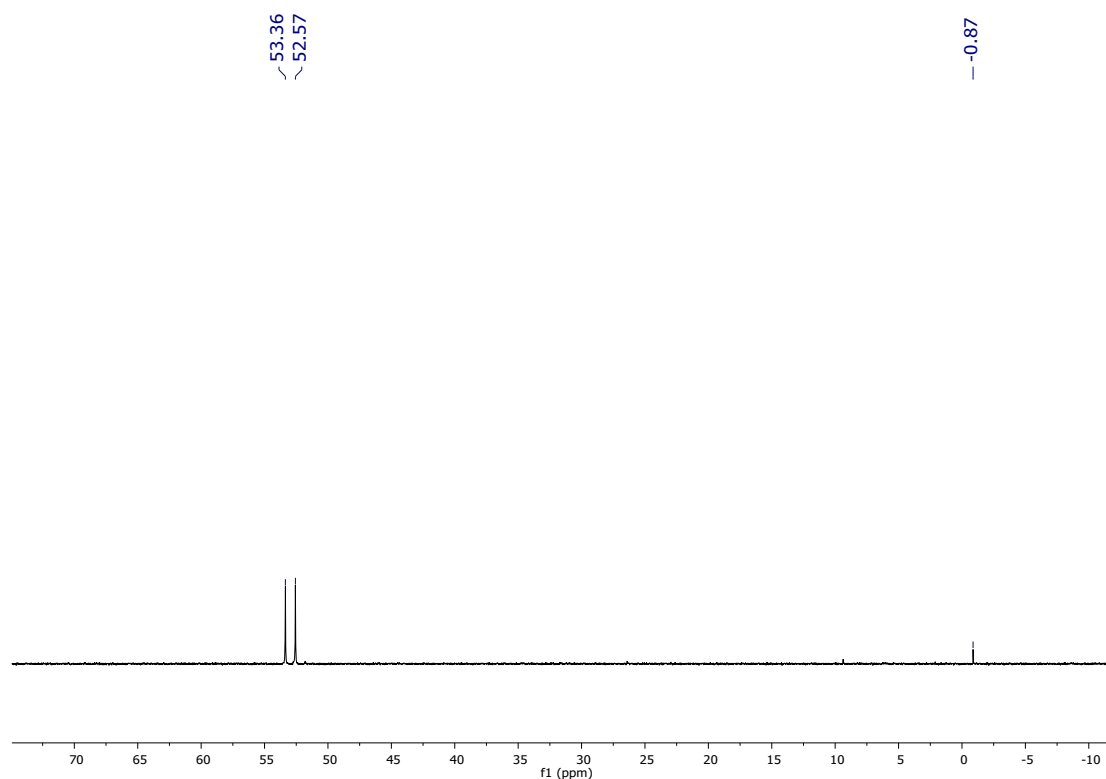

Figure S16. <sup>31</sup>P{<sup>1</sup>H} NMR (202 MHz, 298 K) spectrum of a solution of [2][OTf] after addition of water.

Stability of [3][OTf] in the presence of H<sub>2</sub>O: An NMR sample containing [3][OTf] (4 mg) in CH<sub>2</sub>Cl<sub>2</sub> (0.6 ml) was prepared inside a nitrogen-filled glove box and combined with D<sub>2</sub>O (15 μL). The tube was sonicated for 15 min and subjected to <sup>31</sup>P{<sup>1</sup>H} NMR spectroscopy. The spectrum, displayed in Fig. S17, shows complete decomposition of [3][OTf].

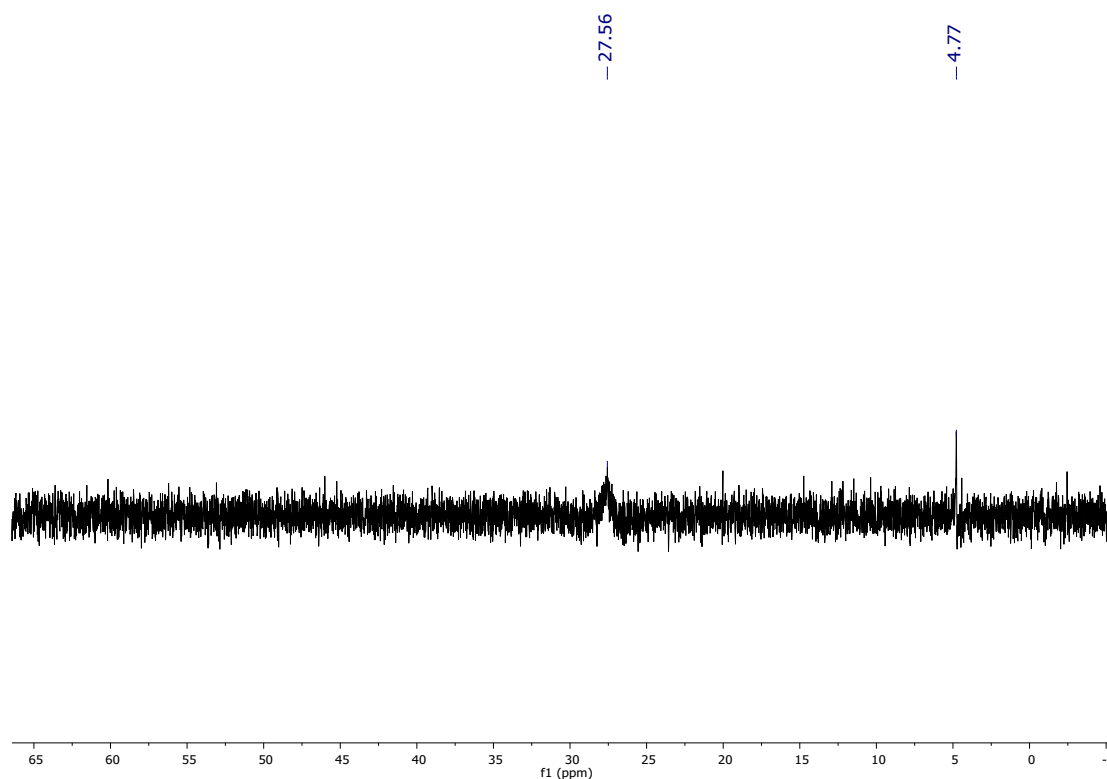

Figure S17. <sup>31</sup>P{<sup>1</sup>H} NMR (202 MHz, 298 K) spectrum of a solution of [3][OTf] after addition of water.



### 3 Computational studies

#### 3.1 General methods

The structures of **[2][OTf]** and **[3][OTf]** were optimized using DFT methods as implemented in Gaussian 16 using the MPW1PW91 functional and a mixed basis set defined as follows: cc-pVTZ-PP for Rh; 6-31G(d',p') for P/Cl; 6-31G(d') for C/N; and 6-31G for H. Frequency calculations, performed using the same level of theory on the optimized geometries, found no imaginary frequencies. NBO analysis was performed using BP86 as the functional and same basis set as mentioned above using the NBO 7.0 program. Pipek-Mezey calculations were carried out on the wave functions derived from the optimized structures using Multiwfn program.<sup>2</sup> The resulting NBO and Pipek-Mezey orbitals were visualized using the Avogadro program.<sup>2</sup>

#### 3.2 Geometry optimized structures

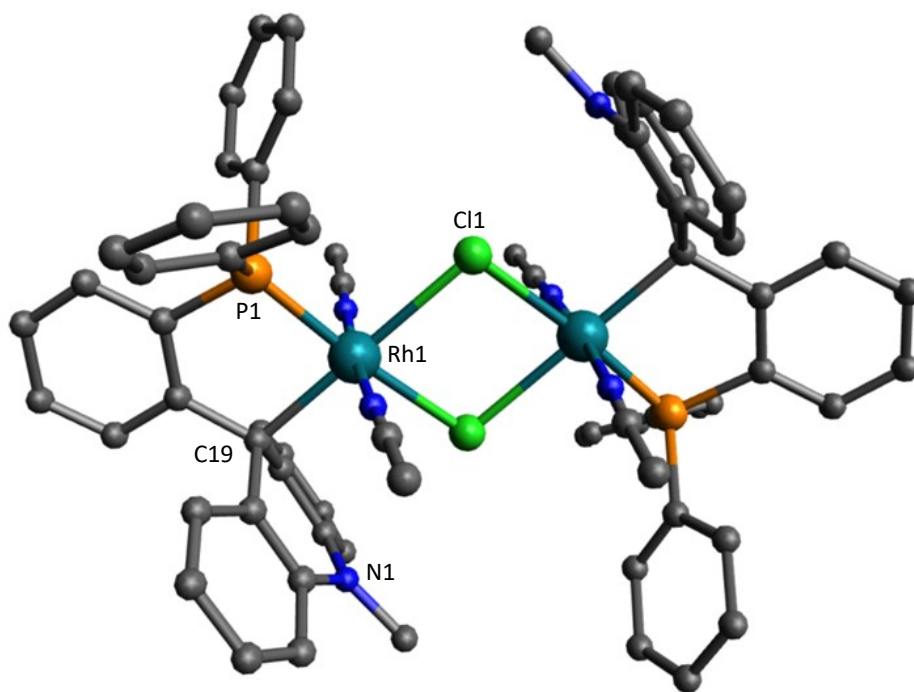

Figure S18. Optimized structure of **[2][OTf]** (hydrogen atoms omitted for clarity).

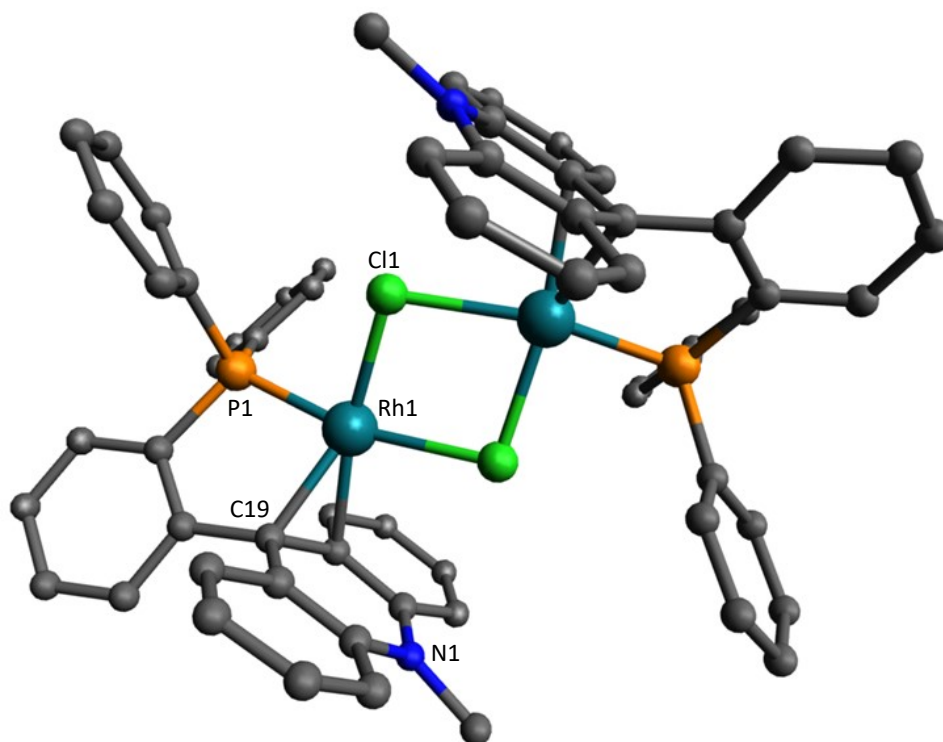

Figure S19. Optimized structure of **[3][OTf]** (hydrogen atoms omitted for clarity).

### 3.4 Pipek-Mezey LMOs

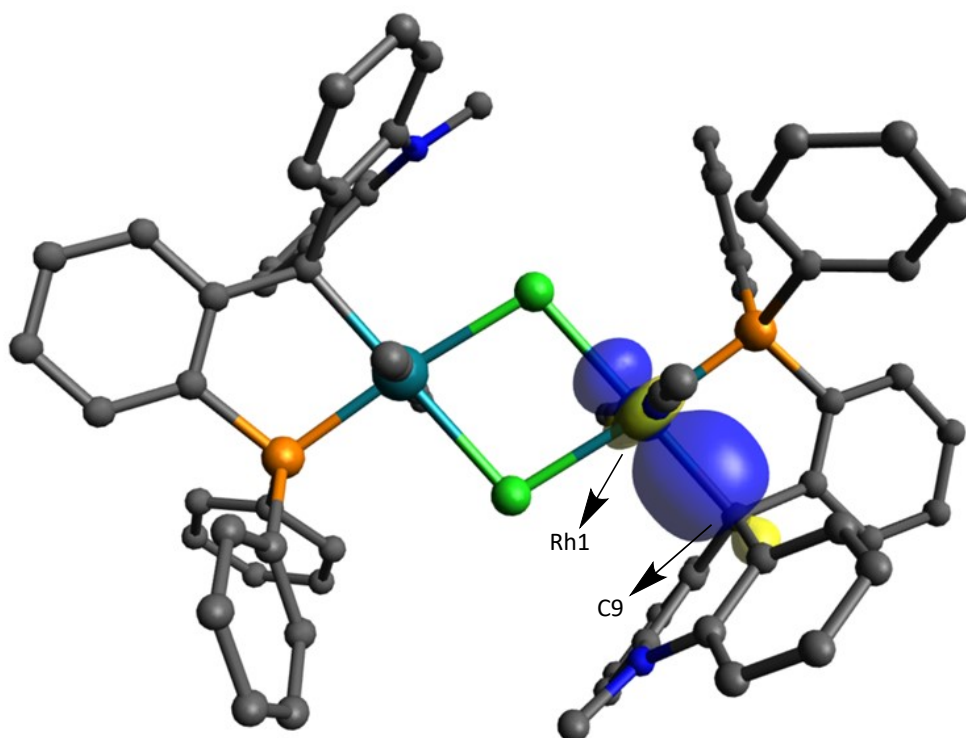

Figure S20. Pipek-Mezey orbital corresponding to the Rh1→C9 bonding in compound **[2]**[OTf]. Parentage: Rh1: 47.1%; C9: 36.8%.

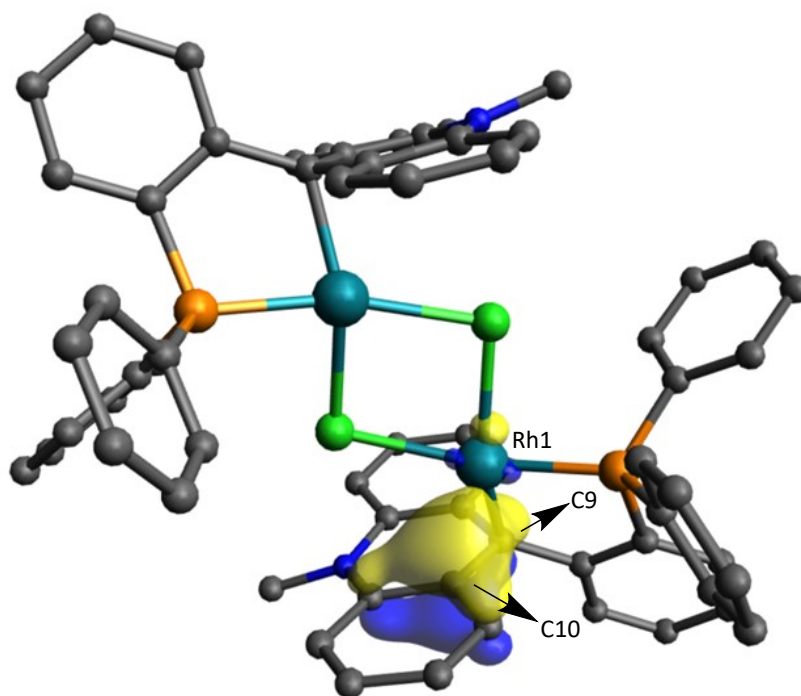

Figure S21. Pipek-Mezey orbital corresponding to the three-centers two-electron bond between C9-C10 and Rh1 in compound **[3]**[OTf]. Parentage: Rh1: 17.0%; C10: 37.7%; C9: 12.3%.

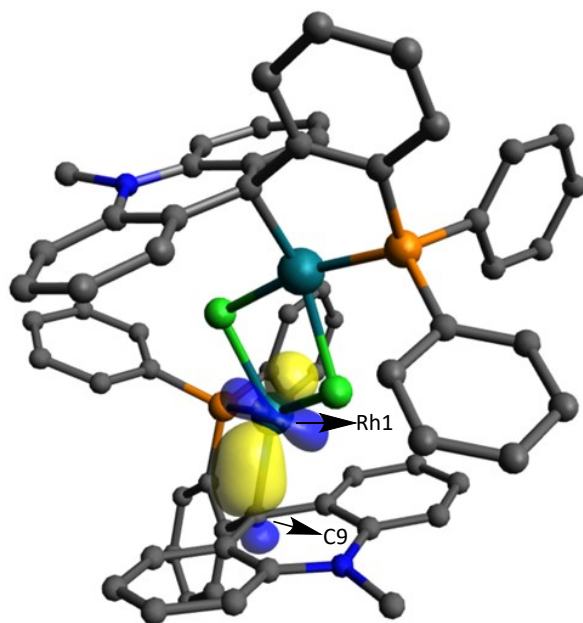

Figure S22. Pipek-Mezey orbital corresponding to the interaction between Rh1→C9 in compound **[3][OTf]**. Parentage: Rh1: 63.7%; C9: 20.5%.

### 3.5 NBO orbital analysis

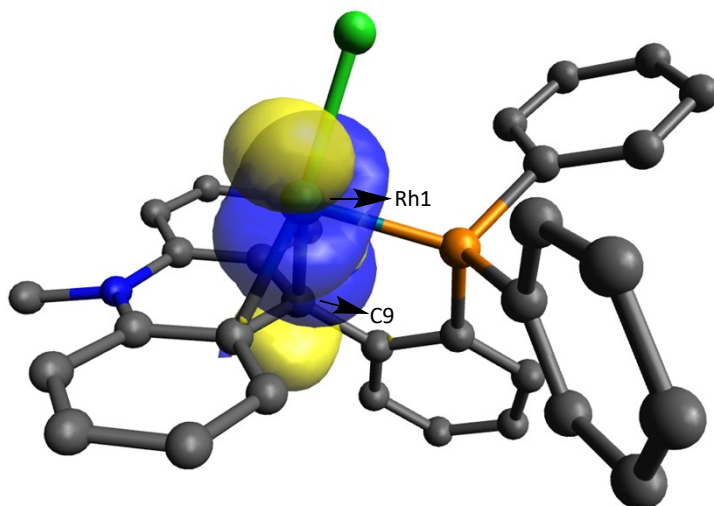

Figure S23. Truncated picture of NBO orbital corresponding to the z-type interaction between Rh1→C9 in compound **[3][OTf]**.

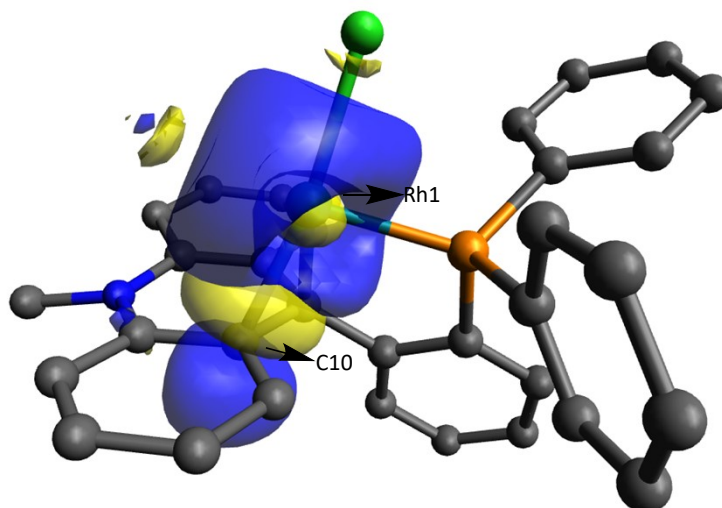

Figure S24. Truncated picture of NBO orbital corresponding to the L-type interaction between C10→Rh1 in compound [3][OTf].

### 3.6 Cartesian coordinates of geometry optimized structures

Table S1. Cartesian coordinates for [2][OTf].

| Atom Number | Coordinates |          |          | Atom Number | Coordinates |          |          |
|-------------|-------------|----------|----------|-------------|-------------|----------|----------|
|             | X           | Y        | Z        |             | X           | Y        | Z        |
| Rh1         | -1.95468    | 0.14881  | -0.13534 | C74         | 7.3118      | 0.21843  | 1.60102  |
| Rh2         | 1.95471     | -0.14879 | 0.13531  | C75         | 5.75015     | 2.42119  | -3.29562 |
| Cl3         | 0.05576     | 1.62139  | -0.22375 | C76         | 3.00142     | 4.03525  | 0.6197   |
| Cl4         | -0.05576    | -1.62133 | 0.22366  | C77         | 2.85287     | 5.14642  | 1.44776  |
| P5          | -3.65979    | -1.33917 | -0.08503 | C78         | 2.00341     | -4.28565 | 3.52186  |
| P6          | 3.65986     | 1.33915  | 0.08508  | C79         | 3.81218     | 2.75146  | 2.50102  |
| N7          | -1.79882    | -0.17406 | -2.07169 | C80         | 1.15146     | -5.06076 | -0.54457 |
| N8          | -1.98524    | 0.39162  | 1.82423  | C81         | 4.75802     | 2.98317  | -4.09676 |
| N9          | -2.11447    | 4.04664  | 0.16507  | C82         | 1.78731     | -4.57116 | 2.18099  |
| N10         | 1.79882     | 0.17403  | 2.07167  | C83         | 3.18038     | 5.06454  | 2.80028  |
| N11         | 1.98532     | -0.39156 | -1.82427 | C84         | 3.66261     | 3.86543  | 3.32378  |
| N12         | 2.11426     | -4.04654 | -0.16517 | H85         | -2.08491    | -2.55079 | 2.04343  |
| C13         | -3.76912    | 2.39748  | 0.81283  | H86         | -5.78146    | 2.81547  | -1.47202 |
| C14         | -3.54903    | 1.65252  | -0.47045 | H87         | -3.84739    | 1.47142  | -3.18337 |
| C15         | -3.11717    | -2.52479 | 2.38369  | H88         | -5.30567    | 1.08689  | 1.54779  |
| C16         | -3.03542    | 2.57769  | -1.53106 | H89         | -7.92953    | 1.78903  | -2.09311 |
| C17         | -5.91015    | 1.74127  | -1.37144 | H90         | -5.60698    | 2.24356  | 3.69662  |
| C18         | -1.97924    | 0.49427  | 2.97102  | H91         | -4.21728    | 4.26088  | 4.21339  |
| C19         | -3.00344    | 3.54989  | 1.10689  | H92         | -2.61762    | 5.10346  | 2.56588  |
| C20         | -4.1151     | -1.97056 | 1.56755  | H93         | -3.04109    | 0.52417  | 4.76017  |
| C21         | -4.84422    | 0.96056  | -0.89491 | H94         | -1.60566    | 1.58309  | 4.7139   |
| C22         | -1.6842     | -0.39336 | -3.19643 | H95         | -1.40698    | -0.18746 | 4.85874  |
| C23         | -3.26049    | 2.33842  | -2.8963  | H96         | -2.59848    | -0.68057 | -5.04176 |
| C24         | -4.70683    | 1.96652  | 1.7634   | H97         | -1.10135    | -1.61883 | -4.78438 |
| C25         | -2.29852    | 3.73146  | -1.17317 | H98         | -1.01426    | 0.1391   | -5.1     |
| C26         | -7.12371    | 1.16152  | -1.72096 | H99         | -2.94567    | 2.94484  | -4.93524 |
| C27         | -4.87501    | 2.61061  | 2.9824   | H100        | -6.40828    | -2.08148 | -1.02032 |
| C28         | -5.05476    | -0.41451 | -0.75992 | H101        | -6.21887    | -1.48141 | 1.42414  |
| C29         | -4.09545    | 3.73203  | 3.27149  | H102        | -2.66105    | -3.46629 | 4.26019  |
| C30         | -3.17594    | 4.20115  | 2.343    | H103        | -8.25821    | -0.67228 | -1.88161 |
| C31         | -3.48158    | -2.82617 | -1.13928 | H104        | -6.77672    | -2.37337 | 3.64858  |
| C32         | -2.00697    | 0.6111   | 4.41279  | H105        | -2.75056    | -4.12476 | 0.43244  |
| C33         | -1.59026    | -0.6548  | -4.61578 | H106        | -2.48659    | -6.07992 | -1.02854 |
| C34         | -2.75245    | 3.16547  | -3.88897 | H107        | -1.6075     | 4.95718  | -4.27961 |
| C35         | -6.27689    | -1.0069  | -1.11752 | H108        | -4.20335    | -1.83032 | -2.92189 |
| C36         | -5.43382    | -1.91638 | 2.03476  | H109        | -1.56759    | 6.07712  | 0.50647  |
| C37         | -3.44103    | -3.03438 | 3.63861  | H110        | -0.28864    | 5.00516  | -0.12075 |
| C38         | -7.31179    | -0.2186  | -1.60098 | H111        | -0.79601    | 4.86092  | 1.55722  |
| C39         | -5.75       | -2.42112 | 3.29575  | H112        | -5.0085     | -3.37742 | 5.0781   |
| C40         | -3.00133    | -4.03528 | -0.6195  | H113        | -1.24899    | 5.47415  | -1.91597 |
| C41         | -2.85278    | -5.14651 | -1.44748 | H114        | -3.06896    | -5.93457 | -3.44187 |
| C42         | -2.00359    | 4.28565  | -3.52196 | H115        | -3.93177    | -3.79529 | -4.37415 |
| C43         | -3.81213    | -2.75163 | -2.50089 | H116        | 2.08502     | 2.55079  | -2.04342 |
| C44         | -1.15174    | 5.06093  | 0.54445  | H117        | 5.78138     | -2.8156  | 1.47197  |
| C45         | -4.75784    | -2.98309 | 4.09687  | H118        | 3.8474      | -1.47153 | 3.18332  |
| C46         | -1.78752    | 4.57121  | -2.18109 | H119        | 5.30561     | -1.08694 | -1.54787 |
| C47         | -3.1803     | -5.06472 | -2.8     | H120        | 7.92947     | -1.78925 | 2.09311  |
| C48         | -3.66255    | -3.86565 | -3.32358 | H121        | 5.60678     | -2.24354 | -3.69676 |
| C49         | 3.76902     | -2.39748 | -0.8129  | H122        | 4.21695     | -4.26076 | -4.21355 |
| C50         | 3.54899     | -1.65255 | 0.4704   | H123        | 2.61729     | -5.10331 | -2.56602 |
| C51         | 3.1173      | 2.52483  | -2.38364 | H124        | 3.04142     | -0.52316 | -4.76014 |
| C52         | 3.03534     | -2.57771 | 1.53099  | H125        | 1.60638     | -1.58263 | -4.71426 |
| C53         | 5.91011     | -1.7414  | 1.37141  | H126        | 1.40705     | 0.18789  | -4.85864 |
| C54         | 1.97944     | -0.49416 | -2.97106 | H127        | 2.59862     | 0.68013  | 5.04172  |
| C55         | 3.00326     | -3.54983 | -1.10698 | H128        | 1.10164     | 1.61868  | 4.78453  |
| C56         | 4.11521     | 1.97059  | -1.56747 | H129        | 1.01426     | -0.13927 | 5.09997  |
| C57         | 4.8442      | -0.96064 | 0.89489  | H130        | 2.94559     | -2.94494 | 4.93517  |
| C58         | 1.68417     | 0.39328  | 3.19641  | H131        | 6.40836     | 2.08134  | 1.0204   |
| C59         | 3.26043     | -2.33849 | 2.89624  | H132        | 6.21897     | 1.48145  | -1.42401 |
| C60         | 4.70671     | -1.96653 | -1.76349 | H133        | 2.66122     | 3.46634  | -4.26014 |
| C61         | 2.29836     | -3.73142 | 1.17308  | H134        | 8.25824     | 0.67206  | 1.88167  |
| C62         | 7.12368     | -1.16169 | 1.72097  | H135        | 6.77689     | 2.37345  | -3.64841 |
| C63         | 4.87481     | -2.61058 | -2.98253 | H136        | 2.75067     | 4.1248   | -0.43222 |
| C64         | 5.05479     | 0.41442  | 0.75994  | H137        | 2.4867      | 6.07986  | 1.02888  |
| C65         | 4.09518     | -3.73194 | -3.27162 | H138        | 1.60728     | -4.95718 | 4.2795   |
| C66         | 3.17567     | -4.20104 | -2.34312 | H139        | 4.20339     | 1.83012  | 2.92197  |
| C67         | 3.48165     | 2.82609  | 1.13941  | H140        | 1.56724     | -6.07697 | -0.50663 |
| C68         | 2.00731     | -0.61057 | -4.41286 | H141        | 0.28837     | -5.00494 | 0.12064  |
| C69         | 1.59037     | 0.65459  | 4.6158   | H142        | 0.79573     | -4.86068 | -1.55733 |
| C70         | 2.75235     | -3.16553 | 3.8889   | H143        | 5.00871     | 3.37752  | -5.07798 |
| C71         | 6.27694     | 1.00676  | 1.11757  | H144        | 1.24872     | -5.47405 | 1.91585  |
| C72         | 5.43394     | 1.91642  | -2.03465 | H145        | 3.06904     | 5.93435  | 3.4422   |
| C73         | 3.44119     | 3.03444  | -3.63854 | H146        | 3.93182     | 3.795    | 4.37435  |

Table S2. Cartesian coordinates for [3][OTf].

| Atom<br>Number | Coordinates |          |          |
|----------------|-------------|----------|----------|
|                | X           | Y        | Z        |
| Rh1            | 1.73093     | -0.5562  | 0.12461  |
| Rh2            | -1.73092    | 0.55619  | 0.12463  |
| Cl3            | 0.54828     | 1.45949  | -0.15879 |
| Cl4            | -0.54827    | -1.45949 | -0.15883 |
| P5             | 3.5492      | 0.66826  | 0.62227  |
| P6             | -3.54921    | -0.66828 | 0.62226  |
| N7             | 1.24694     | -3.91514 | -1.31061 |
| N8             | -1.2469     | 3.91515  | -1.3105  |
| C9             | 4.96241     | -0.27297 | -0.00543 |
| C10            | 2.65897     | -2.11901 | -2.15151 |
| C11            | 1.55654     | -3.62121 | -0.01427 |
| C12            | 6.30517     | 0.11399  | 0.07893  |
| C13            | 1.67029     | -3.11066 | -2.36551 |
| C14            | 3.71718     | 2.3169   | -0.14113 |
| C15            | 0.9795      | -4.31041 | 1.06472  |
| C16            | 3.15348     | -1.8457  | -0.80995 |
| C17            | 4.59579     | -1.43814 | -0.6839  |
| C18            | 2.52493     | -2.58333 | 0.27099  |
| C19            | 3.74226     | 0.92235  | 2.4158   |
| C20            | 2.69317     | 1.55705  | 3.0996   |
| C21            | 3.68305     | 3.66496  | -2.15075 |
| C22            | 5.59375     | -2.24095 | -1.24973 |
| C23            | 4.18501     | 3.41776  | 0.58466  |
| C24            | 3.46102     | 2.44888  | -1.51326 |
| C25            | 0.44086     | -5.09817 | -1.60115 |
| C26            | 3.15001     | -1.39518 | -3.25707 |
| C27            | 2.91403     | -2.36914 | 1.63088  |
| C28            | 3.8918      | 1.30451  | 5.18136  |
| C29            | 1.33802     | -4.01218 | 2.3712   |
| C30            | 1.62795     | -2.53376 | -4.7194  |
| C31            | 4.39952     | 4.63615  | -0.05882 |
| C32            | 2.30626     | -3.04837 | 2.6702   |
| C33            | 2.77422     | 1.75033  | 4.47469  |
| C34            | 4.15347     | 4.76049  | -1.42399 |
| C35            | 2.64772     | -1.59277 | -4.52677 |
| C36            | 4.85973     | 0.47322  | 3.12975  |
| C37            | 6.93056     | -1.87237 | -1.13837 |
| C38            | 1.14815     | -3.28456 | -3.6611  |
| C39            | 7.28862     | -0.69205 | -0.48297 |
| C40            | 4.93056     | 0.66557  | 4.50896  |
| C41            | -4.96242    | 0.273    | -0.00537 |
| C42            | -2.65899    | 2.11908  | -2.15143 |
| C43            | -1.5565     | 3.62119  | -0.01416 |
| C44            | -6.30517    | -0.11395 | 0.079    |
| C45            | -1.67029    | 3.11072  | -2.36541 |
| C46            | -3.71723    | -2.31688 | -0.1412  |
| C47            | -0.97941    | 4.31032  | 1.06486  |
| C48            | -3.15348    | 1.84573  | -0.80988 |
| C49            | -4.59579    | 1.43819  | -0.68381 |
| C50            | -2.5249     | 2.58333  | 0.27108  |
| C51            | -3.74224    | -0.92244 | 2.41579  |
| C52            | -2.69315    | -1.55717 | 3.09955  |
| C53            | -3.6832     | -3.66485 | -2.15088 |
| C54            | -5.59375    | 2.24104  | -1.24959 |
| C55            | -4.18504    | -3.41777 | 0.58455  |
| C56            | -3.46113    | -2.44879 | -1.51335 |
| C57            | -0.4408     | 5.09815  | -1.60108 |
| C58            | -3.15005    | 1.39529  | -3.25701 |
| C59            | -2.91399    | 2.3691   | 1.63096  |
| C60            | -3.89174    | -1.30471 | 5.18134  |
| C61            | -1.33792    | 4.01205  | 2.37133  |

| Atom<br>Number | Coordinates |          |          |
|----------------|-------------|----------|----------|
|                | X           | Y        | Z        |
| C62            | -1.62801    | 2.53395  | -4.71933 |
| C63            | -4.39958    | -4.63613 | -0.05897 |
| C64            | -2.30619    | 3.04826  | 2.67031  |
| C65            | -2.77417    | -1.75051 | 4.47464  |
| C66            | -4.15359    | -4.7604  | -1.42416 |
| C67            | -2.64778    | 1.59295  | -4.52672 |
| C68            | -4.85971    | -0.47333 | 3.12977  |
| C69            | -6.93056    | 1.87246  | -1.13822 |
| H70            | -1.14819    | 3.28469  | -3.661   |
| H71            | -7.28863    | 0.69212  | -0.48285 |
| H72            | -4.93051    | -0.66575 | 4.50897  |
| H73            | 6.5764      | 1.04753  | 0.56494  |
| H74            | 0.21665     | -5.05917 | 0.89628  |
| H75            | 1.81628     | 1.89736  | 2.55374  |
| H76            | 3.49739     | 3.75714  | -3.21749 |
| H77            | 5.32328     | -3.14951 | -1.78094 |
| H78            | 4.38978     | 3.32805  | 1.64733  |
| H79            | 3.0841      | 1.6007   | -2.07963 |
| H80            | 0.65807     | -5.8741  | -0.86769 |
| H81            | 0.72552     | -5.49552 | -2.57462 |
| H82            | -0.62995    | -4.86704 | -1.59114 |
| H83            | 3.93641     | -0.66564 | -3.08877 |
| H84            | 3.76174     | -1.72943 | 1.83995  |
| H85            | 3.9522      | 1.45581  | 6.25525  |
| H86            | 0.86001     | -4.56195 | 3.17755  |
| H87            | 1.20775     | -2.68648 | -5.70904 |
| H88            | 4.77111     | 5.48467  | 0.50854  |
| H89            | 2.60322     | -2.85582 | 3.69542  |
| H90            | 1.96192     | 2.24628  | 4.99863  |
| H91            | 4.33581     | 5.70731  | -1.92463 |
| H92            | 3.03558     | -1.02326 | -5.36538 |
| H93            | 5.67835     | -0.02517 | 2.61851  |
| H94            | 7.69868     | -2.5019  | -1.57804 |
| H95            | 0.34814     | -3.99053 | -3.84537 |
| H96            | 8.33228     | -0.39885 | -0.42029 |
| H97            | 5.80302     | 0.31882  | 5.05518  |
| H98            | -6.57641    | -1.04751 | 0.56497  |
| H99            | -0.21652    | 5.05905  | 0.89646  |
| H100           | -1.81626    | -1.89745 | 2.55366  |
| H101           | -3.49759    | -3.75698 | -3.21764 |
| H102           | -5.32328    | 3.14961  | -1.78078 |
| H103           | -4.38976    | -3.32811 | 1.64724  |
| H104           | -3.08423    | -1.60059 | -2.0797  |
| H105           | -0.65803    | 5.87414  | -0.8677  |
| H106           | -0.72543    | 5.49544  | -2.5746  |
| H107           | 0.63        | 4.86701  | -1.59103 |
| H108           | -3.93645    | 0.66575  | -3.08873 |
| H109           | -3.76171    | 1.72939  | 1.84002  |
| H110           | -3.95213    | -1.45606 | 6.25522  |
| H111           | -0.85987    | 4.56176  | 3.1777   |
| H112           | -1.20784    | 2.68672  | -5.70897 |
| H113           | -4.77116    | -5.48467 | 0.50837  |
| H114           | -2.60314    | 2.85568  | 3.69552  |
| H115           | -1.96187    | -2.24648 | 4.99854  |
| H116           | -4.33597    | -5.7072  | -1.92483 |
| H117           | -3.03567    | 1.02348  | -5.36534 |
| H118           | -5.67833    | 0.02508  | 2.61856  |
| H119           | -7.69868    | 2.50202  | -1.57785 |
| H120           | -0.34819    | 3.99069  | -3.84525 |
| H121           | -8.33228    | 0.39893  | -0.42017 |
| H122           | -5.80297    | -0.31902 | 5.05522  |

## 4 X-ray diffraction analysis

### 4.1 Experimental details

The crystallographic measurements were performed at 110(2) K using a three circle (Quest; Mo K $\alpha$  radiation,  $\lambda$  = 0.71073 Å) and kappa (Venture; Cu K $\alpha$  radiation,  $\lambda$  = 1.54178 Å) Bruker-AXS with I $\mu$ S source and a Photon III area detector diffractometer. In each case, a specimen of suitable size and quality was selected and mounted onto a nylon loop and cooled to 110(2) K in a cold nitrogen stream (OXFORD Cryosystems). The data was collected and reduced using Bruker AXS APEX 3 software<sup>3</sup> and solved by direct methods. Semiempirical absorption corrections were applied using SADABS.<sup>4</sup> Subsequent refinement using a difference map on F<sup>2</sup> using the SHELXTL/PC package (version 6.1 & OLEX<sup>2</sup>).<sup>5</sup> Thermal parameters were refined anisotropically for all non-hydrogen atoms to convergence. H atoms were added at idealized positions using a riding model. The results of these X-ray measurements are provided as CIF files. CCDC 2421484-2421486 contain the supplementary crystallographic data for this paper.

4.2 Table showing the compounds characterized by X-ray diffraction and their corresponding CCDC numbers.

| Compound | CCDC    |
|----------|---------|
| [1][OTf] | 2421484 |
| [2][OTf] | 2421485 |
| [3][OTf] | 2421486 |



## 4.2 Solid state structures

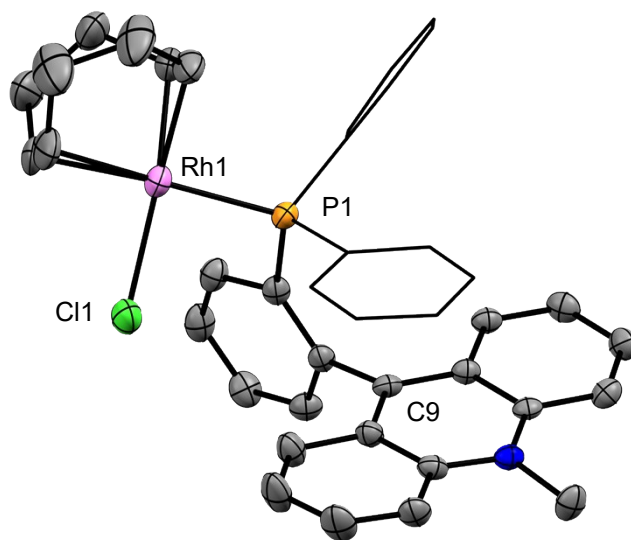

Figure S25. Solid-state structure of **[1][OTf]**. Crystallized by layering diethyl ether over a solution of **[1][OTf]** in dichloroethane. Hydrogen atoms and solvent molecules were omitted for clarity. Selected bond length and angles: Rh1-P1 = 2.3191(12) Å, Rh1-Cl1 = 2.3752(14) Å, Rh1-C9 = 5.381(4) Å, Cl1-Rh1-P1 = 89.74(5)°.

## 5 References

1. L. C. Wilkins, Y. Kim, E. D. Litle and F. P. Gabbaï, *Angew. Chem. Int. Ed.*, 2019, **58**, 18266-18270.
2. a) M. D. Hanwell, D. E. Curtis, D. C. Lonie, T. Vandermeersch, E. Zurek and G. R. Hutchison, *Journal of Cheminformatics*, 2012, **4**, 17; b) J. Pipek and P. G. Mezey, *J. Chem. Phys.*, 1989, **90**, 4916-4926.
3. Bruker, 2019, APEX3 (v2019.2011-2010), Bruker AXS Inc., Madison, Wisconsin, USA.
4. G. M. Sheldrick, *Journal*, 2016.
5. a) G. M. Sheldrick, *Acta Crystallographica Section A*, 2015, **71**, 3-8; b) O. V. Dolomanov, L. J. Bourhis, R. J. Gildea, J. A. K. Howard and H. Puschmann, *J. Appl. Crystallogr.*, 2009, **42**, 339-341.
